# Supplementary material for: Dynamic changes in the regulatory T-cell heterogeneity and function by murine IL-2 mutein
Source: Life Sci Alliance. 2020 Apr 8;3(5):e201900520. doi: 10.26508/lsa.201900520 (PMC7156283; doi:10.26508/lsa.201900520)
Supplement: Supplementary file 1 [file LSA-2019-00520_TableS1.xlsx]

## Sheet: SampleOverview
SubjectID	SUBJECT_INFO_Subject ID	SUBJECT_INFO_Subject Sex	SUBJECT_INFO_Subject Approximate Age (wk)	SUBJECT_INFO_Subject Species	TISSUE_HARVEST_Tissue Type	CELL_INFO_Cell Type	CELL_INFO_Cell Type Enrichment	SAMPLE_TREATMENT_Treatment Agent	SAMPLE_RECEIPT_Tissue Isolation Date	Sample Preparation	Platform Type	NGS Library Prep Method	# of Cells (post-filtering)	Adapter Index	Seq Cycles	Seq Instrument	FASTQ_ID
1_Spleen_CD4+Foxp3+_Isotype Control_10x Chromium, 3’-end V2 Gene Expression	1	Female	10	C57BL/6 Mouse	Spleen	Regulatory T-Lymphocytes	CD4+Foxp3+	Isotype Control	2017-10-17	Purified-FACS	RNA-Seq Transcription Profiling by Single-Cell	10x Chromium, 3’-end V2 Gene Expression	3386	SI-GA-G1	26x8x0x98	HiSeq4000	DLCL03-1_1/DLCL03-1-1
1_Lung_CD4+Foxp3+_Isotype Control_10x Chromium, 3’-end V2 Gene Expression	1	Female	10	C57BL/6 Mouse	Lung	Regulatory T-Lymphocytes	CD4+Foxp3+	Isotype Control	2017-10-17	Purified-FACS	RNA-Seq Transcription Profiling by Single-Cell	10x Chromium, 3’-end V2 Gene Expression	1904	SI-GA-G2	26x8x0x98	HiSeq4000	DLCL03-1_2/DLCL03-1-2
1_Small Intestine_CD4+Foxp3+_Isotype Control_10x Chromium, 3’-end V2 Gene Expression	1	Female	10	C57BL/6 Mouse	Small Intestine	Regulatory T-Lymphocytes	CD4+Foxp3+	Isotype Control	2017-10-17	Purified-FACS	RNA-Seq Transcription Profiling by Single-Cell	10x Chromium, 3’-end V2 Gene Expression	958	SI-GA-G3	26x8x0x98	HiSeq4000	DLCL03-2_1/DLCL03-2-1
3_Spleen_CD4+Foxp3+_mIL2-mutein_10x Chromium, 3’-end V2 Gene Expression	3	Female	10	C57BL/6 Mouse	Spleen	Regulatory T-Lymphocytes	CD4+Foxp3+	mIL2-mutein	2017-10-17	Purified-FACS	RNA-Seq Transcription Profiling by Single-Cell	10x Chromium, 3’-end V2 Gene Expression	4060	SI-GA-G4	26x8x0x98	HiSeq4000	DLCL03-2_2/DLCL03-2-2
3_Lung_CD4+Foxp3+_mIL2-mutein_10x Chromium, 3’-end V2 Gene Expression	3	Female	10	C57BL/6 Mouse	Lung	Regulatory T-Lymphocytes	CD4+Foxp3+	mIL2-mutein	2017-10-17	Purified-FACS	RNA-Seq Transcription Profiling by Single-Cell	10x Chromium, 3’-end V2 Gene Expression	2532	SI-GA-G5	26x8x0x98	HiSeq4000	DLCL03-3/DLCL03-3
4_Spleen_CD4+Foxp3+_Isotype Control_10x Chromium, 3’-end V2 Gene Expression	4	Female	10	C57BL/6 Mouse	Spleen	Regulatory T-Lymphocytes	CD4+Foxp3+	Isotype Control	2018-03-08	Purified-FACS	RNA-Seq Transcription Profiling by Single-Cell	10x Chromium, 3’-end V2 Gene Expression	3437	SI-GA-C1	26x8x0x98	NovaSeq6000	SplTreg_iso/SI-GA-C1
4_Lung_CD4+Foxp3+_Isotype Control_10x Chromium, 3’-end V2 Gene Expression	4	Female	10	C57BL/6 Mouse	Lung	Regulatory T-Lymphocytes	CD4+Foxp3+	Isotype Control	2018-03-08	Purified-FACS	RNA-Seq Transcription Profiling by Single-Cell	10x Chromium, 3’-end V2 Gene Expression	1783	SI-GA-C2	26x8x0x98	NovaSeq6000	LungTreg_iso/SI-GA-C2
4_Small Intestine_CD4+Foxp3+_Isotype Control_10x Chromium, 3’-end V2 Gene Expression	4	Female	10	C57BL/6 Mouse	Small Intestine	Regulatory T-Lymphocytes	CD4+Foxp3+	Isotype Control	2018-03-08	Purified-FACS	RNA-Seq Transcription Profiling by Single-Cell	10x Chromium, 3’-end V2 Gene Expression	1413	SI-GA-C3	26x8x0x98	NovaSeq6000	GutTreg_iso/SI-GA-C3
6_Spleen_CD4+Foxp3+_mIL2-mutein_10x Chromium, 3’-end V2 Gene Expression	6	Female	10	C57BL/6 Mouse	Spleen	Regulatory T-Lymphocytes	CD4+Foxp3+	mIL2-mutein	2018-03-08	Purified-FACS	RNA-Seq Transcription Profiling by Single-Cell	10x Chromium, 3’-end V2 Gene Expression	1920	SI-GA-C4	26x8x0x98	NovaSeq6000	SplTreg_IL2/SI-GA-C4
6_Lung_CD4+Foxp3+_mIL2-mutein_10x Chromium, 3’-end V2 Gene Expression	6	Female	10	C57BL/6 Mouse	Lung	Regulatory T-Lymphocytes	CD4+Foxp3+	mIL2-mutein	2018-03-08	Purified-FACS	RNA-Seq Transcription Profiling by Single-Cell	10x Chromium, 3’-end V2 Gene Expression	1625	SI-GA-C5	26x8x0x98	NovaSeq6000	LungTreg_IL2/SI-GA-C5
6_Small Intestine_CD4+Foxp3+_mIL2-mutein_10x Chromium, 3’-end V2 Gene Expression	6	Female	10	C57BL/6 Mouse	Small Intestine	Regulatory T-Lymphocytes	CD4+Foxp3+	mIL2-mutein	2018-03-08	Purified-FACS	RNA-Seq Transcription Profiling by Single-Cell	10x Chromium, 3’-end V2 Gene Expression	1644	SI-GA-C6	26x8x0x98	NovaSeq6000	GutTreg_IL2/SI-GA-C6
7_Spleen_CD4+Foxp3+_Isotype Control_10x Chromium, 5’-end Gene Expression	7	Female	10	C57BL/6 Mouse	Spleen	Regulatory T-Lymphocytes	CD4+Foxp3+	Isotype Control	2018-06-05	Purified-FACS	RNA-Seq Transcription Profiling by Single-Cell	10x Chromium, 5’-end Gene Expression	1500	SI-GA-A1	26x8x0x98	NovaSeq6000	Tr_spl_iso/Tr-sp-iso
7_Lung_CD4+Foxp3+_Isotype Control_10x Chromium, 5’-end Gene Expression	7	Female	10	C57BL/6 Mouse	Lung	Regulatory T-Lymphocytes	CD4+Foxp3+	Isotype Control	2018-06-05	Purified-FACS	RNA-Seq Transcription Profiling by Single-Cell	10x Chromium, 5’-end Gene Expression	1394	SI-GA-A2	26x8x0x98	NovaSeq6000	Tr_lung_iso/Tr-lu-iso
7_Small Intestine_CD4+Foxp3+_Isotype Control_10x Chromium, 5’-end Gene Expression	7	Female	10	C57BL/6 Mouse	Small Intestine	Regulatory T-Lymphocytes	CD4+Foxp3+	Isotype Control	2018-06-05	Purified-FACS	RNA-Seq Transcription Profiling by Single-Cell	10x Chromium, 5’-end Gene Expression	377	SI-GA-A3	26x8x0x98	NovaSeq6000	Tr_gut_iso/Tr-gu-iso
7_Spleen_CD4+Foxp3-_Isotype Control_10x Chromium, 5’-end Gene Expression	7	Female	10	C57BL/6 Mouse	Spleen	CD4-Positive T-Lymphocyte	CD4+Foxp3-	Isotype Control	2018-06-05	Purified-FACS	RNA-Seq Transcription Profiling by Single-Cell	10x Chromium, 5’-end Gene Expression	1647	SI-GA-A4	26x8x0x98	NovaSeq6000	Tc_spl_iso/Tc-sp-iso
7_Lung_CD4+Foxp3-_Isotype Control_10x Chromium, 5’-end Gene Expression	7	Female	10	C57BL/6 Mouse	Lung	CD4-Positive T-Lymphocyte	CD4+Foxp3-	Isotype Control	2018-06-05	Purified-FACS	RNA-Seq Transcription Profiling by Single-Cell	10x Chromium, 5’-end Gene Expression	1546	SI-GA-A5	26x8x0x98	NovaSeq6000	Tc_lung_iso/Tc-lu-iso
7_Small Intestine_CD4+Foxp3-_Isotype Control_10x Chromium, 5’-end Gene Expression	7	Female	10	C57BL/6 Mouse	Small Intestine	CD4-Positive T-Lymphocyte	CD4+Foxp3-	Isotype Control	2018-06-05	Purified-FACS	RNA-Seq Transcription Profiling by Single-Cell	10x Chromium, 5’-end Gene Expression	1561	SI-GA-A6	26x8x0x98	NovaSeq6000	Tc_gut_iso/Tc-gu-iso
8_Spleen_CD4+Foxp3+_mIL2-mutein_10x Chromium, 5’-end Gene Expression	8	Female	10	C57BL/6 Mouse	Spleen	Regulatory T-Lymphocytes	CD4+Foxp3+	mIL2-mutein	2018-06-05	Purified-FACS	RNA-Seq Transcription Profiling by Single-Cell	10x Chromium, 5’-end Gene Expression	2794	SI-GA-A7	26x8x0x98	NovaSeq6000	Tr_spl_il2/Tr-sp-mut
8_Lung_CD4+Foxp3+_mIL2-mutein_10x Chromium, 5’-end Gene Expression	8	Female	10	C57BL/6 Mouse	Lung	Regulatory T-Lymphocytes	CD4+Foxp3+	mIL2-mutein	2018-06-05	Purified-FACS	RNA-Seq Transcription Profiling by Single-Cell	10x Chromium, 5’-end Gene Expression	1115	SI-GA-A8	26x8x0x98	NovaSeq6000	Tr_lung_il2/Tr-lu-mut
8_Small Intestine_CD4+Foxp3+_mIL2-mutein_10x Chromium, 5’-end Gene Expression	8	Female	10	C57BL/6 Mouse	Small Intestine	Regulatory T-Lymphocytes	CD4+Foxp3+	mIL2-mutein	2018-06-05	Purified-FACS	RNA-Seq Transcription Profiling by Single-Cell	10x Chromium, 5’-end Gene Expression	66	SI-GA-A9	26x8x0x98	NovaSeq6000	Tr_gut_il2/Tr-gu-mut
8_Spleen_CD4+Foxp3-_mIL2-mutein_10x Chromium, 5’-end Gene Expression	8	Female	10	C57BL/6 Mouse	Spleen	CD4-Positive T-Lymphocyte	CD4+Foxp3-	mIL2-mutein	2018-06-05	Purified-FACS	RNA-Seq Transcription Profiling by Single-Cell	10x Chromium, 5’-end Gene Expression	2475	SI-GA-A10	26x8x0x98	NovaSeq6000	Tc_spl_il2/Tc-sp-mut
8_Lung_CD4+Foxp3-_mIL2-mutein_10x Chromium, 5’-end Gene Expression	8	Female	10	C57BL/6 Mouse	Lung	CD4-Positive T-Lymphocyte	CD4+Foxp3-	mIL2-mutein	2018-06-05	Purified-FACS	RNA-Seq Transcription Profiling by Single-Cell	10x Chromium, 5’-end Gene Expression	1603	SI-GA-A11	26x8x0x98	NovaSeq6000	Tc_lung_il2/Tr-lu-mut
8_Small Intestine_CD4+Foxp3-_mIL2-mutein_10x Chromium, 5’-end Gene Expression	8	Female	10	C57BL/6 Mouse	Small Intestine	CD4-Positive T-Lymphocyte	CD4+Foxp3-	mIL2-mutein	2018-06-05	Purified-FACS	RNA-Seq Transcription Profiling by Single-Cell	10x Chromium, 5’-end Gene Expression	750	SI-GA-A12	26x8x0x98	NovaSeq6000	Tc_gut_il2/Tc-gu-mut
7_Spleen_CD4+Foxp3+_Isotype Control_10x Chromium, 5'-mouse TCR Sequencing	7	Female	10	C57BL/6 Mouse	Spleen	Regulatory T-Lymphocytes	CD4+Foxp3+	Isotype Control	2018-06-05	Purified-FACS	RNA-Seq Transcription Profiling by Single-Cell	10x Chromium, 5'-mouse TCR Sequencing	1500	SI-GA-B1	150x8x0x150	NovaSeq6000	Tr_spl_iso/Tr-sp-iso
7_Lung_CD4+Foxp3+_Isotype Control_10x Chromium, 5'-mouse TCR Sequencing	7	Female	10	C57BL/6 Mouse	Lung	Regulatory T-Lymphocytes	CD4+Foxp3+	Isotype Control	2018-06-05	Purified-FACS	RNA-Seq Transcription Profiling by Single-Cell	10x Chromium, 5'-mouse TCR Sequencing	1394	SI-GA-B2	150x8x0x150	NovaSeq6000	Tr_lung_iso/Tr-lu-iso
7_Small Intestine_CD4+Foxp3+_Isotype Control_10x Chromium, 5'-mouse TCR Sequencing	7	Female	10	C57BL/6 Mouse	Small Intestine	Regulatory T-Lymphocytes	CD4+Foxp3+	Isotype Control	2018-06-05	Purified-FACS	RNA-Seq Transcription Profiling by Single-Cell	10x Chromium, 5'-mouse TCR Sequencing	377	SI-GA-B3	150x8x0x150	NovaSeq6000	Tr_gut_iso/Tr-gu-iso
7_Spleen_CD4+Foxp3-_Isotype Control_10x Chromium, 5'-mouse TCR Sequencing	7	Female	10	C57BL/6 Mouse	Spleen	CD4-Positive T-Lymphocyte	CD4+Foxp3-	Isotype Control	2018-06-05	Purified-FACS	RNA-Seq Transcription Profiling by Single-Cell	10x Chromium, 5'-mouse TCR Sequencing	1647	SI-GA-B4	150x8x0x150	NovaSeq6000	Tc_spl_iso/Tc-sp-iso
7_Lung_CD4+Foxp3-_Isotype Control_10x Chromium, 5'-mouse TCR Sequencing	7	Female	10	C57BL/6 Mouse	Lung	CD4-Positive T-Lymphocyte	CD4+Foxp3-	Isotype Control	2018-06-05	Purified-FACS	RNA-Seq Transcription Profiling by Single-Cell	10x Chromium, 5'-mouse TCR Sequencing	1546	SI-GA-B5	150x8x0x150	NovaSeq6000	Tc_lung_iso/Tc-lu-iso
7_Small Intestine_CD4+Foxp3-_Isotype Control_10x Chromium, 5'-mouse TCR Sequencing	7	Female	10	C57BL/6 Mouse	Small Intestine	CD4-Positive T-Lymphocyte	CD4+Foxp3-	Isotype Control	2018-06-05	Purified-FACS	RNA-Seq Transcription Profiling by Single-Cell	10x Chromium, 5'-mouse TCR Sequencing	1561	SI-GA-B6	150x8x0x150	NovaSeq6000	Tc_gut_iso/Tc-gu-iso
8_Spleen_CD4+Foxp3+_mIL2-mutein_10x Chromium, 5'-mouse TCR Sequencing	8	Female	10	C57BL/6 Mouse	Spleen	Regulatory T-Lymphocytes	CD4+Foxp3+	mIL2-mutein	2018-06-05	Purified-FACS	RNA-Seq Transcription Profiling by Single-Cell	10x Chromium, 5'-mouse TCR Sequencing	2794	SI-GA-B7	150x8x0x150	NovaSeq6000	Tr_spl_il2/Tr-sp-mut
8_Lung_CD4+Foxp3+_mIL2-mutein_10x Chromium, 5'-mouse TCR Sequencing	8	Female	10	C57BL/6 Mouse	Lung	Regulatory T-Lymphocytes	CD4+Foxp3+	mIL2-mutein	2018-06-05	Purified-FACS	RNA-Seq Transcription Profiling by Single-Cell	10x Chromium, 5'-mouse TCR Sequencing	1115	SI-GA-B8	150x8x0x150	NovaSeq6000	Tr_lung_il2/Tr-lu-mut
8_Small Intestine_CD4+Foxp3+_mIL2-mutein_10x Chromium, 5'-mouse TCR Sequencing	8	Female	10	C57BL/6 Mouse	Small Intestine	Regulatory T-Lymphocytes	CD4+Foxp3+	mIL2-mutein	2018-06-05	Purified-FACS	RNA-Seq Transcription Profiling by Single-Cell	10x Chromium, 5'-mouse TCR Sequencing	66	SI-GA-B9	150x8x0x150	NovaSeq6000	Tr_gut_il2/Tr-gu-mut
8_Spleen_CD4+Foxp3-_mIL2-mutein_10x Chromium, 5'-mouse TCR Sequencing	8	Female	10	C57BL/6 Mouse	Spleen	CD4-Positive T-Lymphocyte	CD4+Foxp3-	mIL2-mutein	2018-06-05	Purified-FACS	RNA-Seq Transcription Profiling by Single-Cell	10x Chromium, 5'-mouse TCR Sequencing	2475	SI-GA-B10	150x8x0x150	NovaSeq6000	Tc_spl_il2/Tc-sp-mut
8_Lung_CD4+Foxp3-_mIL2-mutein_10x Chromium, 5'-mouse TCR Sequencing	8	Female	10	C57BL/6 Mouse	Lung	CD4-Positive T-Lymphocyte	CD4+Foxp3-	mIL2-mutein	2018-06-05	Purified-FACS	RNA-Seq Transcription Profiling by Single-Cell	10x Chromium, 5'-mouse TCR Sequencing	1603	SI-GA-B11	150x8x0x150	NovaSeq6000	Tc_lung_il2/Tr-lu-mut
8_Small Intestine_CD4+Foxp3-_mIL2-mutein_10x Chromium, 5'-mouse TCR Sequencing	8	Female	10	C57BL/6 Mouse	Small Intestine	CD4-Positive T-Lymphocyte	CD4+Foxp3-	mIL2-mutein	2018-06-05	Purified-FACS	RNA-Seq Transcription Profiling by Single-Cell	10x Chromium, 5'-mouse TCR Sequencing	750	SI-GA-B12	150x8x0x150	NovaSeq6000	Tc_gut_il2/Tc-gu-mut
